# Supplementary material for: Learning cellular morphology with neural networks
Source: Springer Nature journal article supplement (doi:10.1038/s41467-019-10836-3), 2019-06-21
Supplement: MOESM1 [file 41467_2019_10836_MOESM1_ESM.pdf]

# Learning cellular morphology with neural networks

Schubert et al.

Supplementary Information

## Supplementary Figures

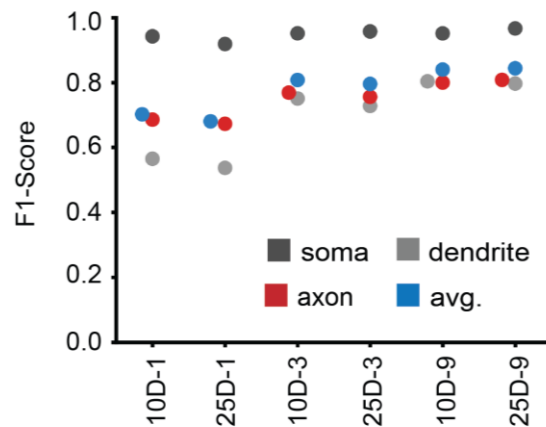

**Supplementary Figure 1** Effect of increasing number of nearest rendering locations during similar view sampling on the t-CMN performance with  $d_z=10, 25$  latent dimensions. E.g. 10D-3/9 represents a t-CMN with a 10 dimensional latent space for which the similar view was drawn from one of the two/eight nearest neighbors with  $p=0.25$  during training.

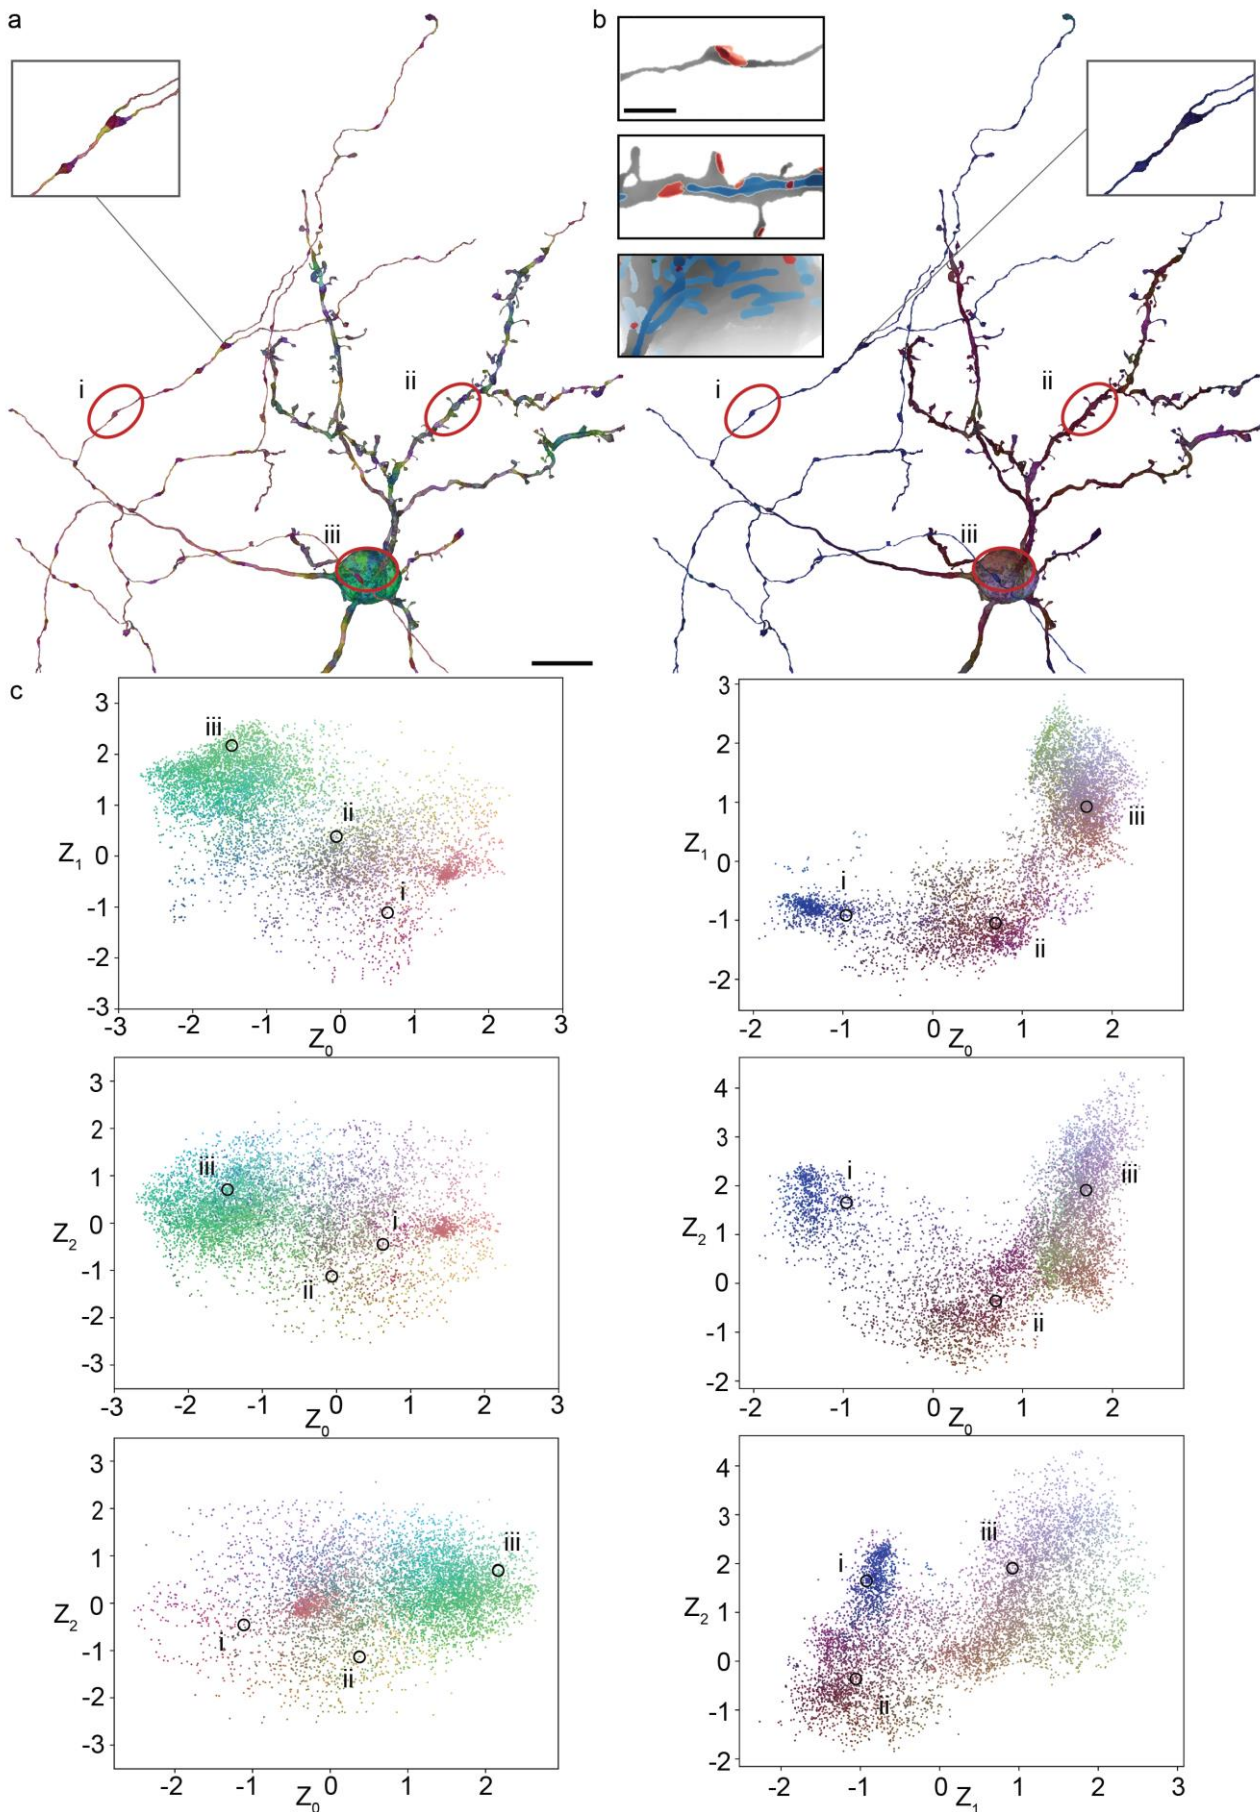

**Supplementary Figure 2** Effect of triplet net ground truth adaption on latent space. Left: Latent space dimension  $d_z=10$ . Similar view was rotated by  $50^\circ$ . Right:  $d_z=10$ . Similar view was rotated by  $50^\circ$  or drawn ( $p=0.25$ ) from one of the 8 nearest rendering locations. The scale bar in a is  $10\ \mu\text{m}$ . **a**

The cell reconstruction renderings were colored according to the top three principal components (captured data variance left: 0.602, right: 0.790). A rendering close-up of one location was added for comparison of the two different latent-colors and to illustrate the smoothing effect. **b** Projection views of the cell and cell organelle surfaces (red: synaptic junction, blue: mitochondria) at the example locations i-iii (from top to bottom, respectively; see **a** and **c**). **c** Principal component distribution of the cell reconstruction. The PCA was fitted to the latent space of the triplet network's training data. Example locations i-iii are indicated in **a** and **c**.

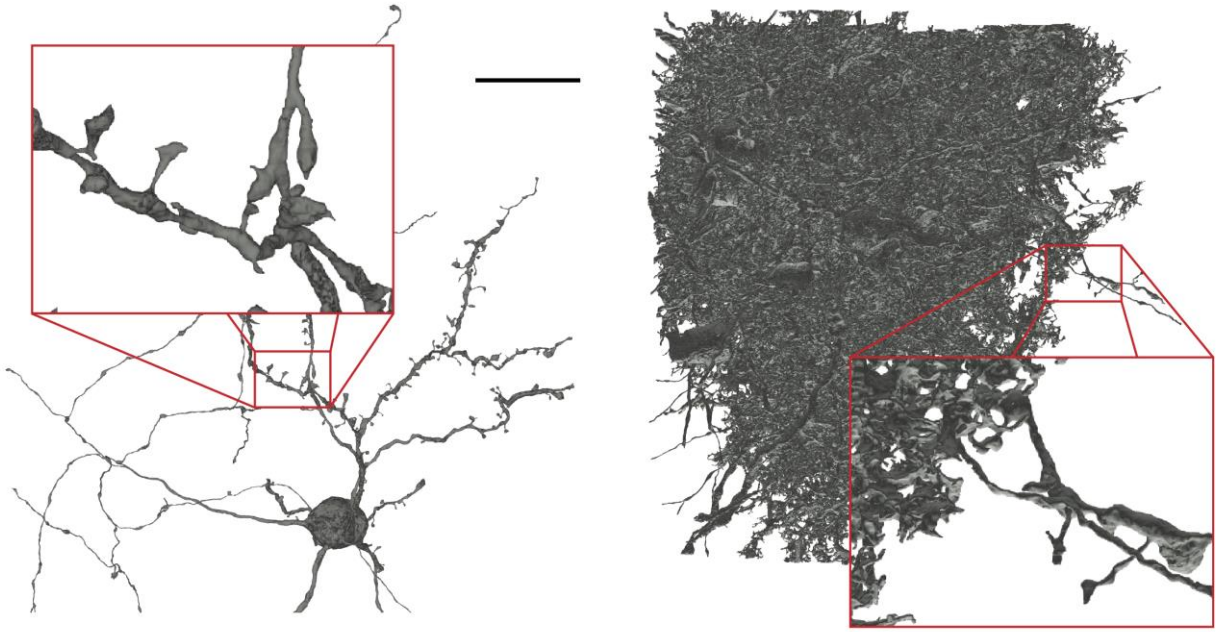

**Supplementary Figure 3** Neuron reconstruction (left) and falsely merged neuron supervoxels (right) with glial fragments. Scale bar is 20  $\mu\text{m}$ .

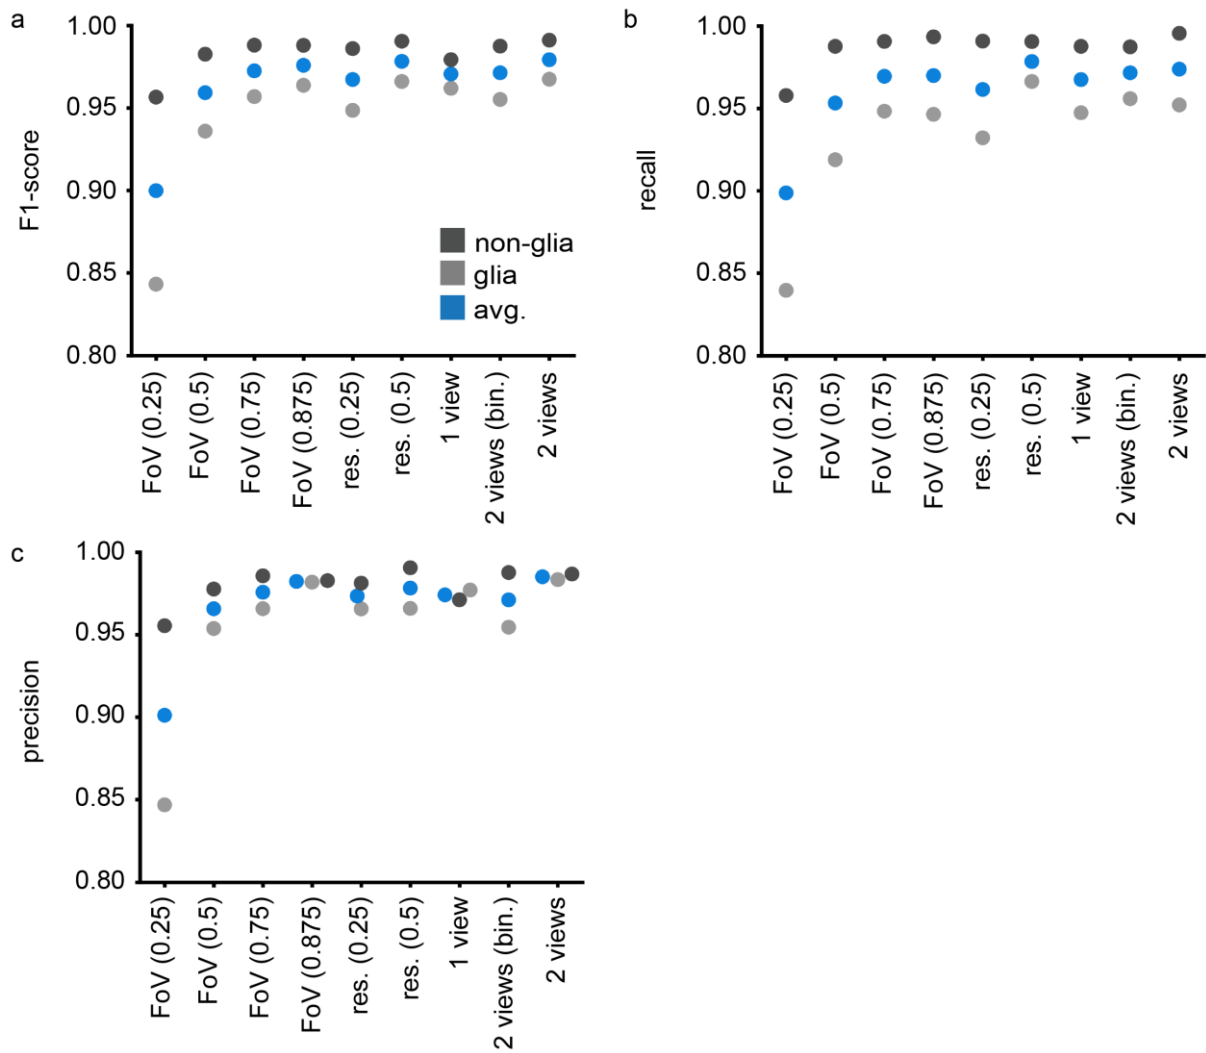

**Supplementary Figure 4** Multi-view classification performance on validation set (non-glia: 7,588; glia: 2,107) for different inputs. Left to right: Multi-view resolution was reduced by cropping 3/8 of the images on each side; cropping 1/4 of the images on each side; cropping 1/8 of the images on each side; cropping 1/16 of the images on each side; 4x downsampling; 2x downsampling; single view perpendicular to the 1st and 2nd p.c.; binarized input views; two views at full resolution (256 x 128 px). **a** F1-score. **b** Recall. **c** Precision.

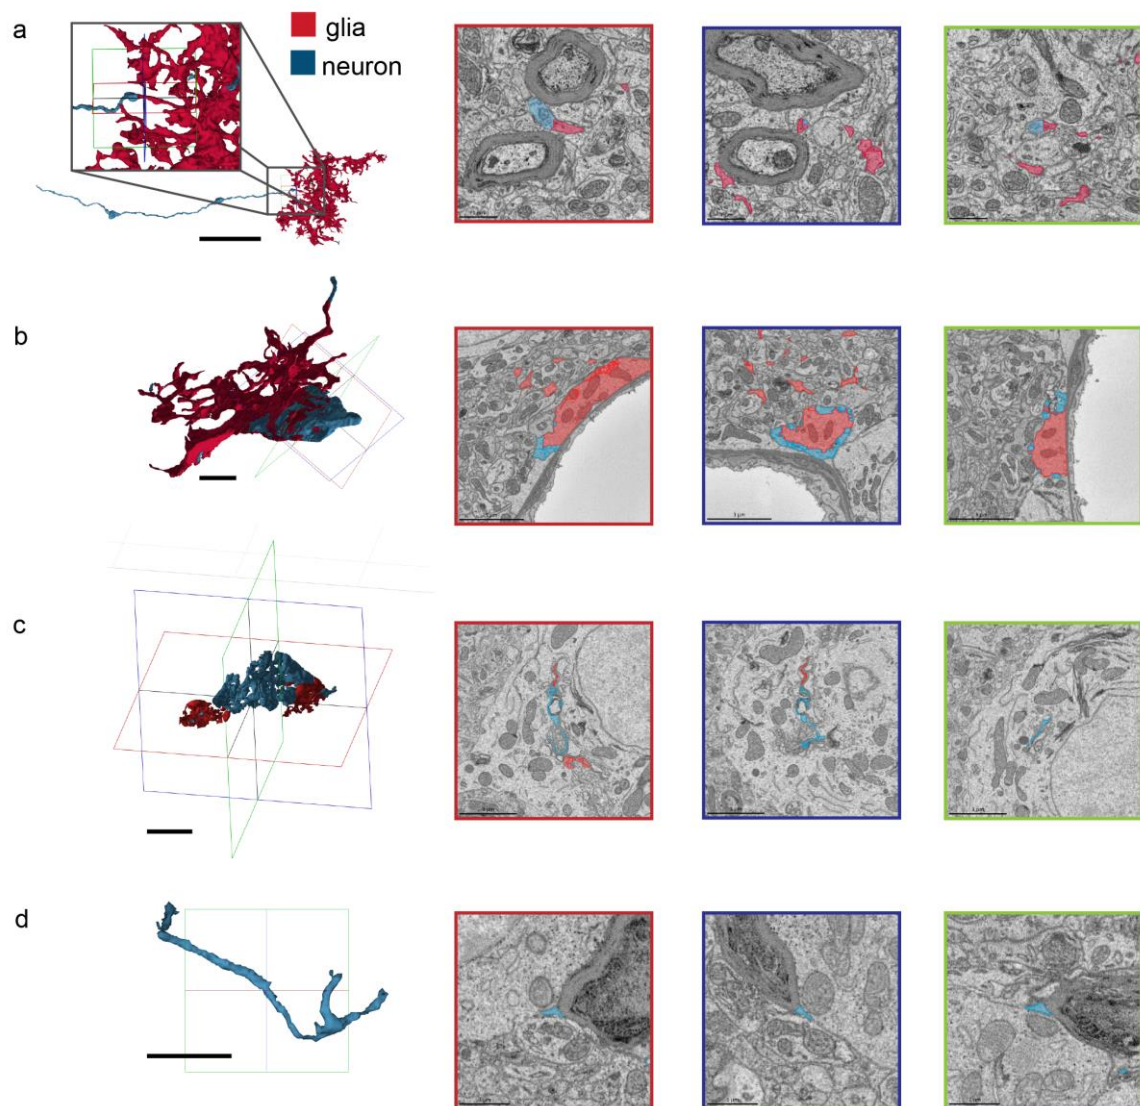

**Supplementary Figure 5** Erroneous glia predictions of histogram in Fig. 3b sorted by bounding box diagonal (BBD). **a** Fragments of an axon reconstructions were covered by glia (67  $\mu\text{m}$ ). **b** Glial SVs at a blood vessel were predicted as neuron (17  $\mu\text{m}$ ). **c** Falsely predicted soma fragments (8  $\mu\text{m}$ ). **d** Glial tip fragment touching a myelinated axon was falsely predicted as neuron (8  $\mu\text{m}$ ). Scale bars are 10 $\mu\text{m}$  in **a** and 2  $\mu\text{m}$  for **b-d**.



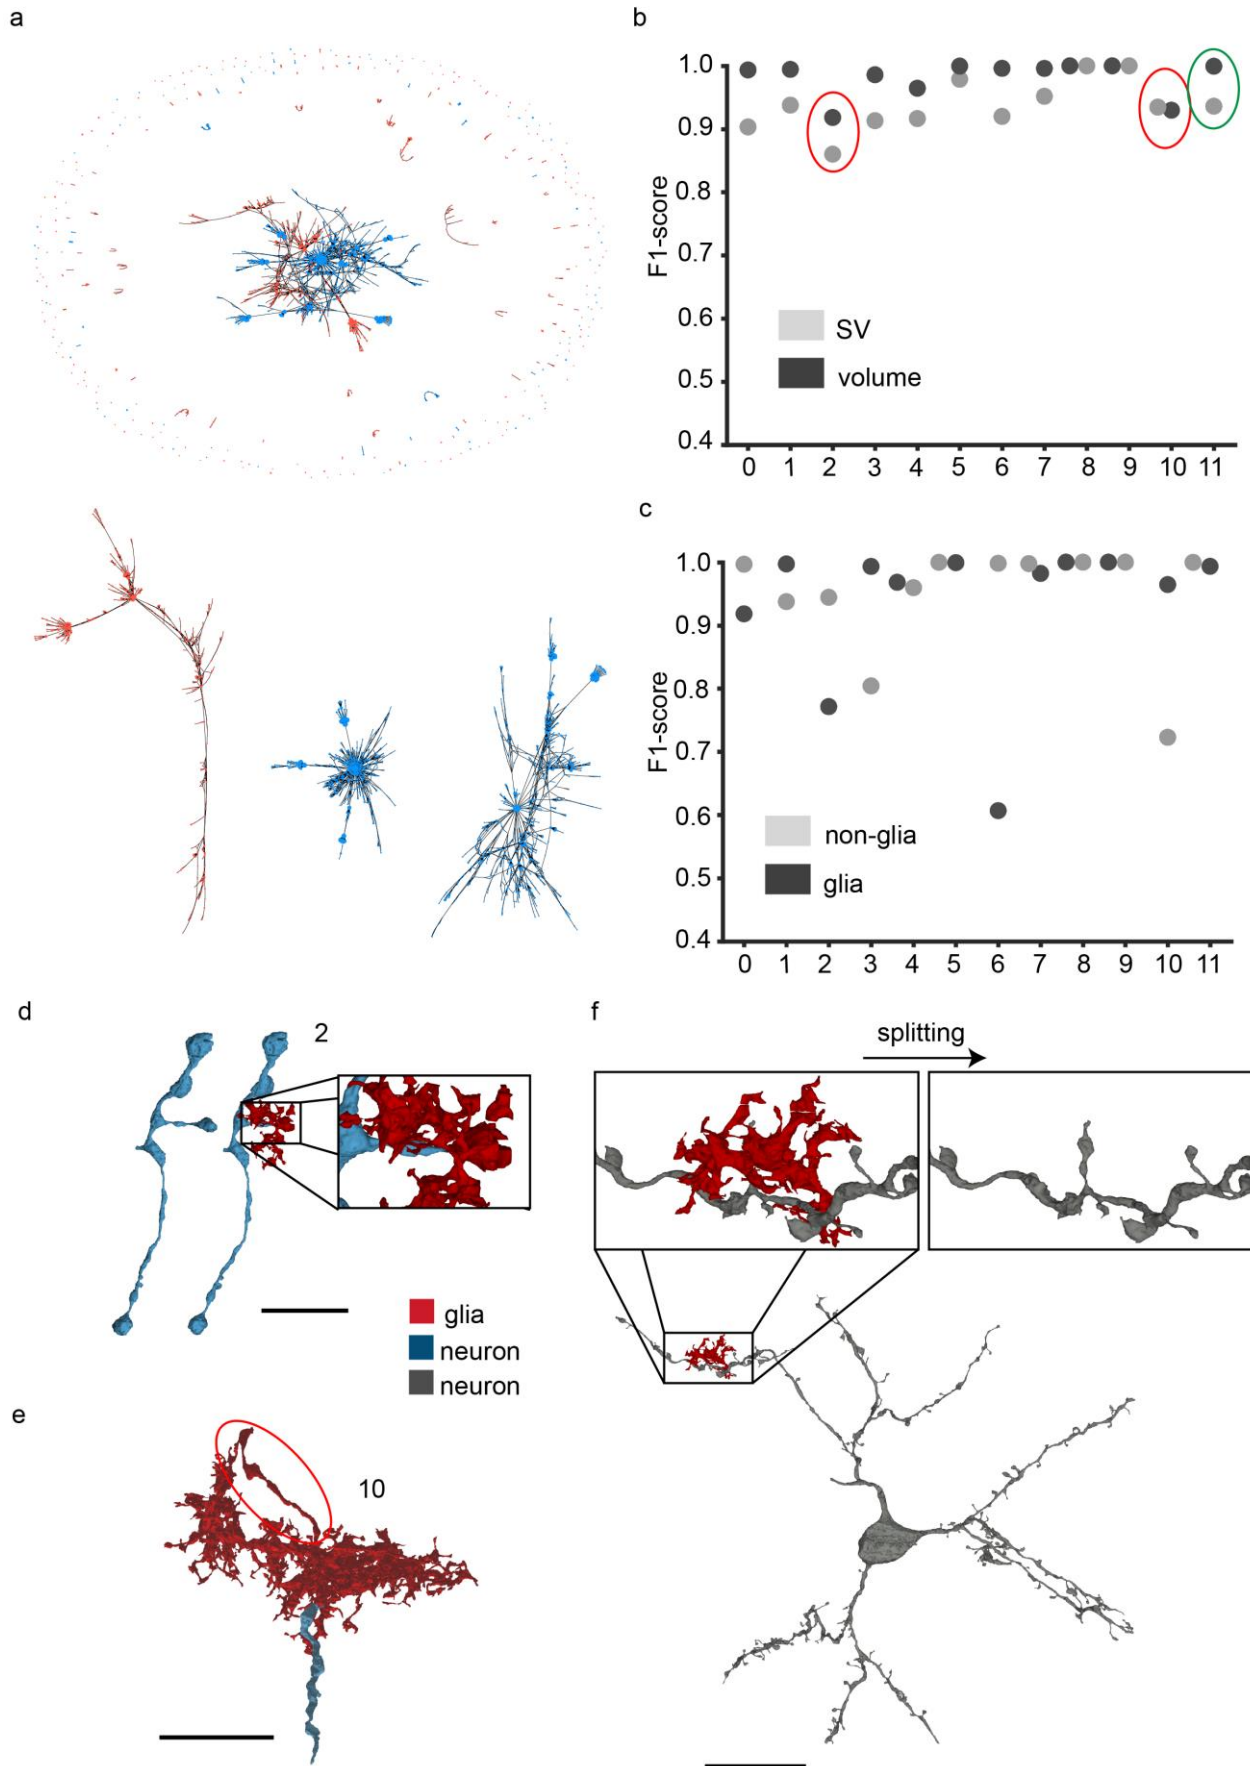

**Supplementary Figure 6** Detailed splitting performance values of 12 cell reconstructions and three renderings of split examples. **a** Result of naive splitting procedure (top; removal of edges between glia and neuron SV) vs splitting heuristic (bottom) for reconstruction 11 (see Fig. 3c,d; red: glia; blue:



neuron). **b** Unweighted vs SV-volume-weighted F1-scores of combined non-glia and glia classes (ellipsoids indicate f.l.t.r d, e and Fig. 3d). **c** Non-glia vs glia volume-weighted F1-scores, showing similar error rates for both classes. **d,e,f** Resulting components after splitting procedure: False positive glia prediction example of an axonal terminal bouton (2 in b, c) covered with glia (right) and the actual neuron component (left). Example of a harmful split introduced in an axon-glia merger (10 in b,c). Correctly resolved neuron-glia merger (red: glia; grey: neuron). Scale bars are 10  $\mu\text{m}$  in **d, e** and 20  $\mu\text{m}$  in **f**.

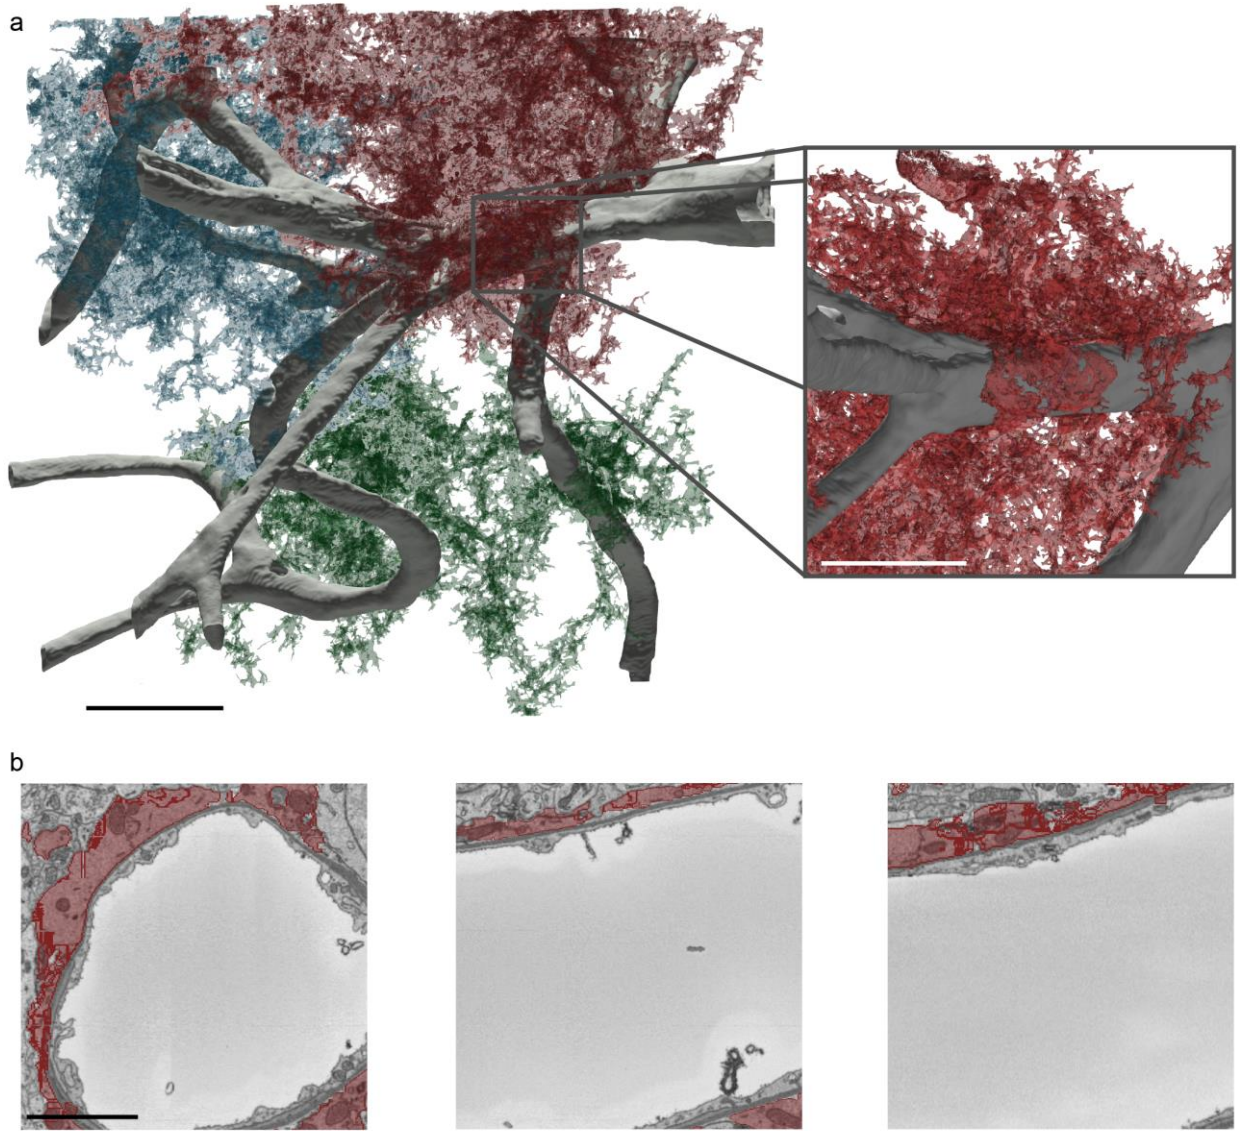

**Supplementary Figure 7** Three glial interactions (indicated by color) with a blood vessel **a**. Each color indicates a connected component found by breadth-first-search (BFS) at the contact location. **b** shows the blood brain barrier at the red sample location. The three corresponding EM slices are shown in **b**. Scale bars are 20  $\mu\text{m}$  in **a**, 15  $\mu\text{m}$  for the inset and 3  $\mu\text{m}$  in **b**.

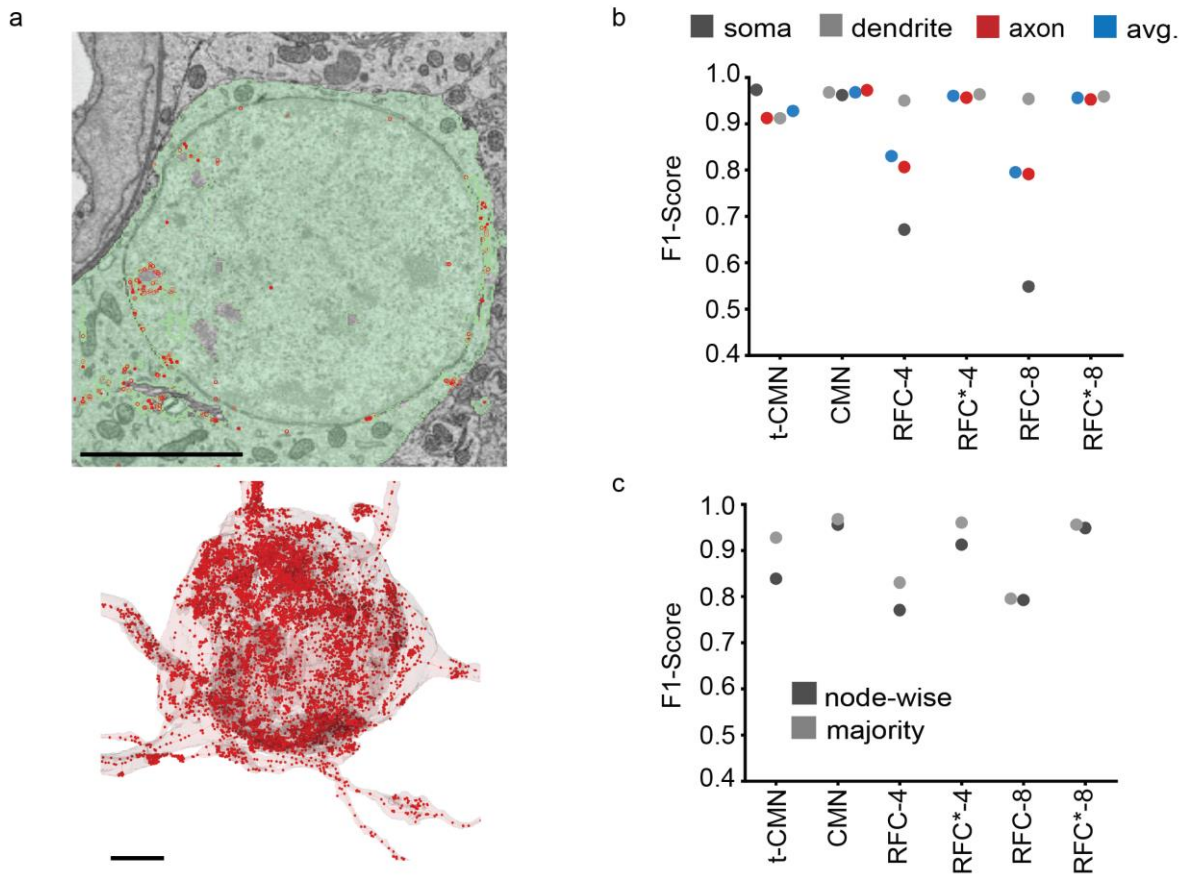

**Supplementary Figure 8** Example soma skeleton from and comparison of compartment classification performance on the test set (test set as in Fig. 5c). **a** Example SV segmentation and corresponding skeletonization (red dots and lines) of a soma (top), showing the effect of SV fragmentation on the automatic skeletonization (bottom). **b** Class-wise F1-score after majority vote within sliding windows (see Methods). **c** Comparison of average F1-score between node-wise (Fig. 5c) and sliding window majority classification (b). Scale bars in **a** are 3.5  $\mu\text{m}$  (top) and 2  $\mu\text{m}$  (bottom).

## Supplementary Notes

**Supplementary Note 1** A vertex-wise performance evaluation (1 MSN dendritic tree reconstruction; 0.27 mm; 0.02 GV; 25  $\mu\text{m}^3$ ) showed that the propagation of vertex predictions to uncovered vertices (for coverage ratios see Fig. 6c) using a kNN classifier was only slightly affected by the number of renderings per location and the number of nearest neighbors  $k$  (F1-score for  $k=1$  and 1 view: 0.903;  $k=20$  and 6 views: 0.922).

**Supplementary Note 2** Manual ground truth painting speeds estimated to be about 12  $\mu\text{m}^3\text{h}^{-1}$  for mitochondria, 55  $\mu\text{m}^3\text{h}^{-1}$  for synaptic junctions and 35  $\mu\text{m}^3\text{h}^{-1}$  based on annotations in a comparable Area X data set (resolution 10 x 10 x 25 nm). Cell type, cell compartment and glia annotations for the training/validation GT took less than 5h using KNOSSOS, since entire SSVs could be labeled, each yielding thousands of view locations. Manual annotation times of node-wise cell compartment (test set) and spine ground truth were 2.3h (2130  $\mu\text{m}^3$ ; 933  $\mu\text{m}^3\text{h}^{-1}$ ) and 2.7h (1652  $\mu\text{m}^3$ ; 608  $\mu\text{m}^3\text{h}^{-1}$ ), respectively.

## Supplementary Tables

| step                  | total time [s] | time / location [s] |
|-----------------------|----------------|---------------------|
| render locations (**) | 133,14         | 0,048               |
| PCA rotation          | 9,67           | 0,004               |
| cell shape rend. (**) | 45,56          | 0,017               |
| glia pred (**)        | 45,04          | 0,016               |
| PCA rotation          | 9,67           | 0,004               |
| c.o. rendering (**)   | 59,40          | 0,022               |
| comp. prediction (**) | 47,99          | 0,017               |
| c.t. prediction (**)  | 42,74          | 0,016               |
| index rendering (**)  | 191,47         | 0,070               |
| spine prediction (**) | 65,97          | 0,024               |
| spine mapping         | 631,63         | 0,229               |

**Supplementary Table 1** Runtime of each step in the multi-view pipeline. Rows 1-4: glia removal, rows 5-11: neuron analysis. Steps indicated with \*\* also utilized the GPU. The run time (second column; average of three runs) was measured on two SSVs (854 and 86 SVs; 2447 and 307 rendering locations). Column three shows the average time per location. Abbreviations: Cell organelle (c.o.); cellular compartment (comp.); cell type (c.t.).
